# Supplementary material for: Chromosome territories reposition during DNA damage-repair response
Source: PubMed Central journal article supplement (PMC4062845; doi:10.1186/gb-2013-14-12-r135), 2013-12-13

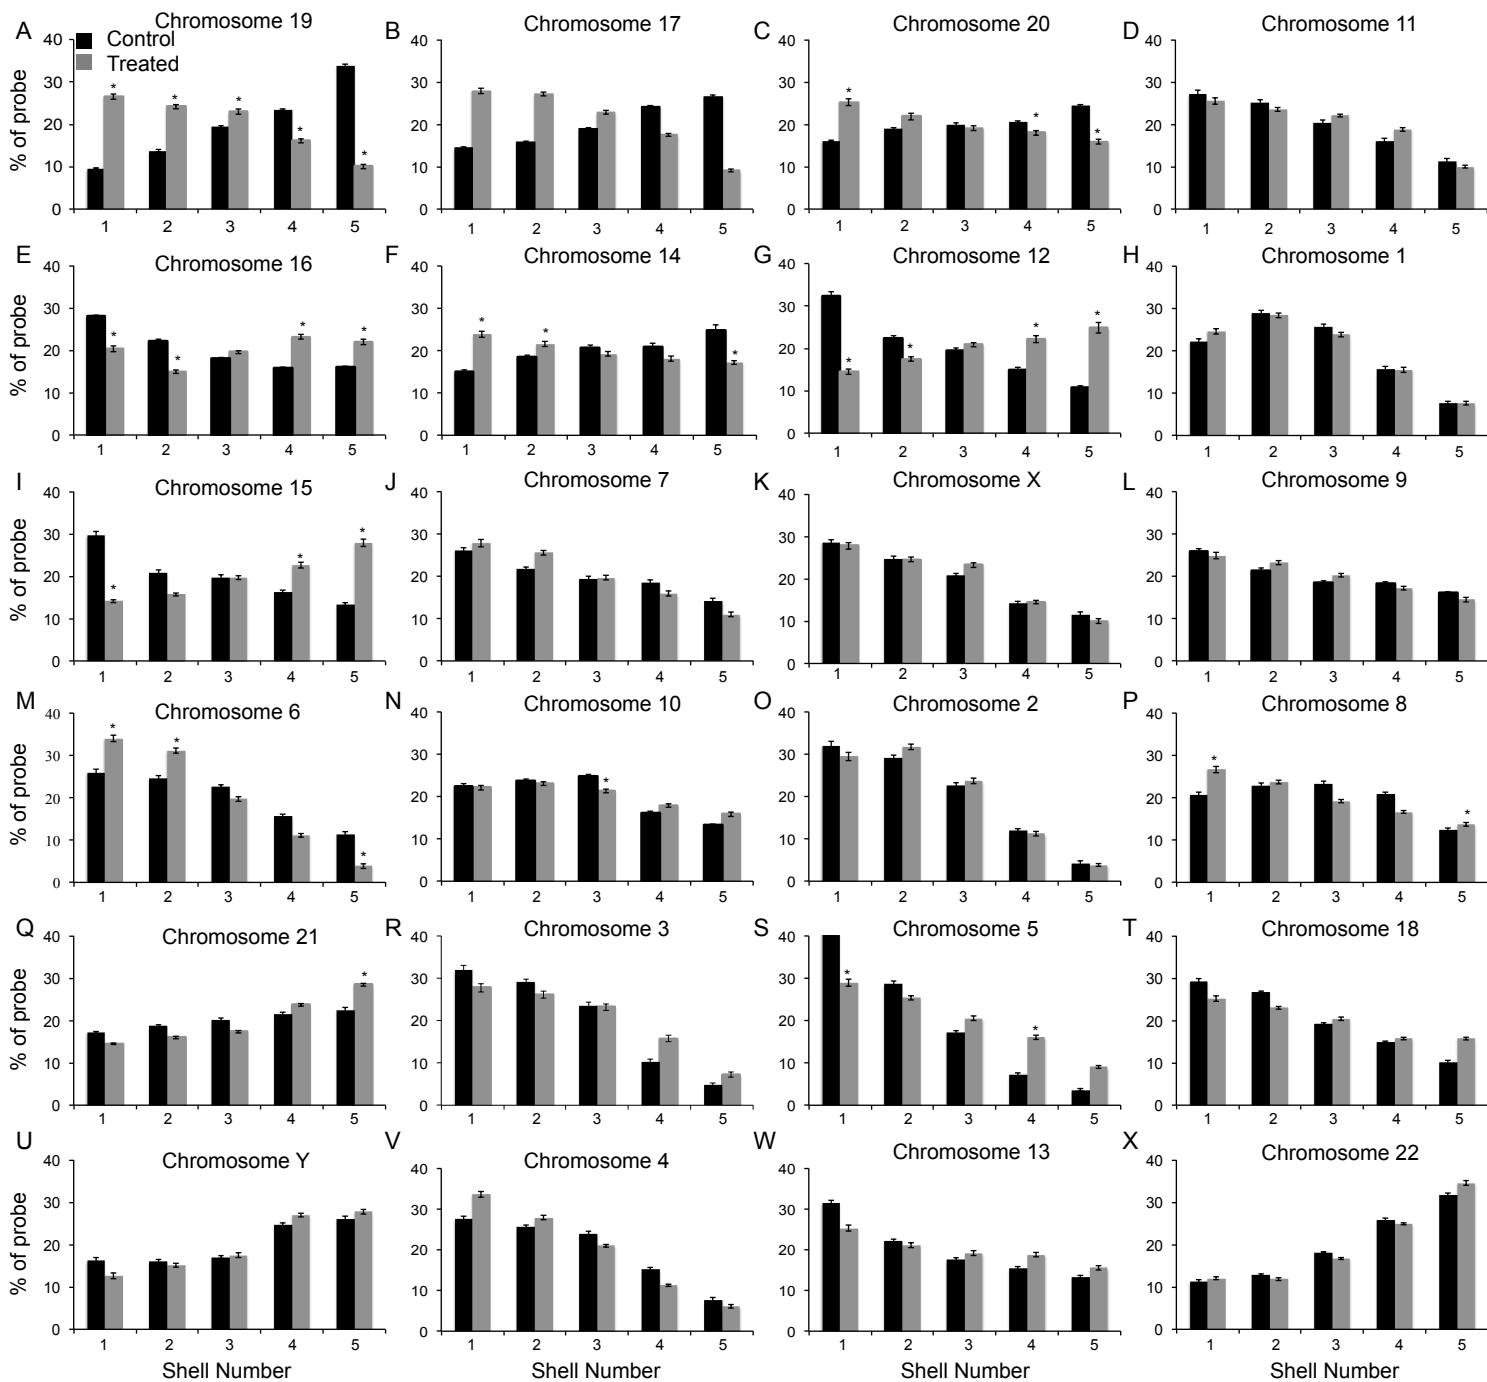

Supplement: gb-2013-14-12-r135-S1.pdf [file gb-2013-14-12-r135-S1.pdf]
