# Supplementary material for: Chromosome territories reposition during DNA damage-repair response
Source: PubMed Central journal article supplement (PMC4062845; doi:10.1186/gb-2013-14-12-r135), 2013-12-13
Supplement: gb-2013-14-12-r135-S4.pdf [file gb-2013-14-12-r135-S4.pdf]

## PANEL 1

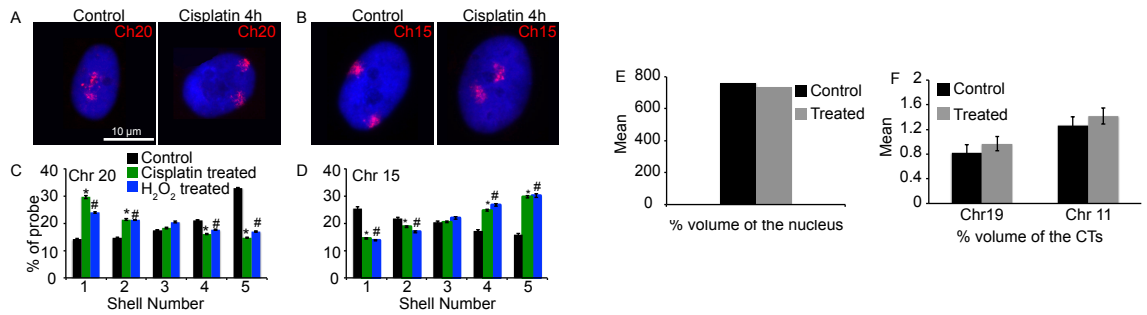

## PANEL 2

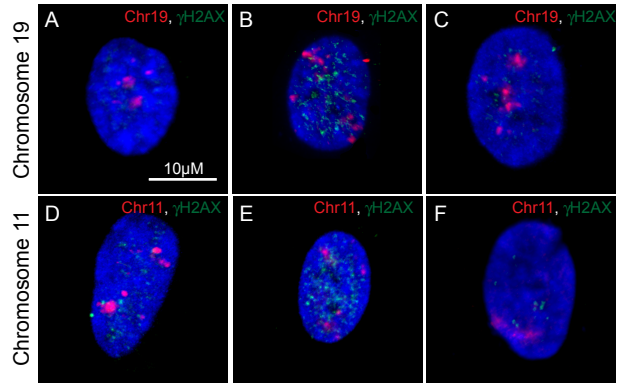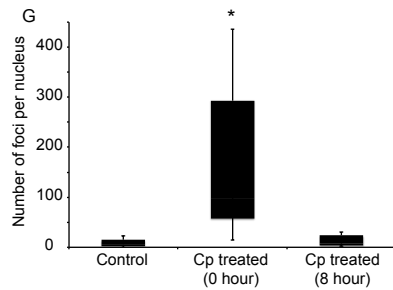

**H**

|            | Chr11     |        | Chr19     |        |
|------------|-----------|--------|-----------|--------|
|            | DSB [No.] | DSB/Mb | DSB [No.] | DSB/Mb |
| Control    | 0.64      | 0.005  | 0.48      | 0.008  |
| Cp treated | 14.08     | 0.105  | 9.44      | 0.150  |
| Recovery   | 2.28      | 0.017  | 1.20      | 0.019  |
