# Supplementary material for: Chromosome territories reposition during DNA damage-repair response
Source: PubMed Central journal article supplement (PMC4062845; doi:10.1186/gb-2013-14-12-r135), 2013-12-13
Supplement: gb-2013-14-12-r135-S5.pdf [file gb-2013-14-12-r135-S5.pdf]

|                      | <b>Positions</b>    | <b>Control</b> | <b>Cisplatin treated 4h</b> | <b>Post Cisplatin wash-off</b> |
|----------------------|---------------------|----------------|-----------------------------|--------------------------------|
| <b>Chromosome 12</b> | <b>Interior</b>     | $0 \pm 0$      | $75 \pm 8.67$               | $2.5 \pm 2.38$                 |
|                      | <b>Intermediate</b> | $30 \pm 5.12$  | $25 \pm 5.03$               | $20 \pm 5.25$                  |
|                      | <b>Peripheral</b>   | $70 \pm 5.19$  | $0 \pm 0$                   | $77.5 \pm 5$                   |
| <b>Chromosome 15</b> | <b>Interior</b>     | $0 \pm 0$      | $72.5 \pm 9.23$             | $5 \pm 4.56$                   |
|                      | <b>Intermediate</b> | $30 \pm 5.89$  | $27.5 \pm 6.22$             | $17.5 \pm 4.92$                |
|                      | <b>Peripheral</b>   | $70 \pm 5.17$  | $0 \pm 0$                   | $77.5 \pm 5.98$                |
| <b>Chromosome 17</b> | <b>Interior</b>     | $85 \pm 2.67$  | $0 \pm 0$                   | $80 \pm 5.18$                  |
|                      | <b>Intermediate</b> | $15 \pm 5.14$  | $12.5 \pm 4.06$             | $20 \pm 5.23$                  |
|                      | <b>Peripheral</b>   | $0 \pm 0$      | $87.5 \pm 3.56$             | $0 \pm 0$                      |
| <b>Chromosome 19</b> | <b>Interior</b>     | $90 \pm 2.35$  | $2.5 \pm 3.12$              | $87.5 \pm 2.12$                |
|                      | <b>Intermediate</b> | $10 \pm 3.12$  | $5 \pm 6.03$                | $12.5 \pm 4.12$                |
|                      | <b>Peripheral</b>   | $0 \pm 0$      | $92.5 \pm 1.32$             | $0 \pm 0$                      |
